# Supplementary material for: Characterizing preferences of fishermen to inform decision-making: A case study of the Pacific halibut (Hippoglossus stenolepis) fishery off Alaska
Source: PLoS One. 2019 Mar 1;14(3):e0212537. doi: 10.1371/journal.pone.0212537 (PMC6396916; doi:10.1371/journal.pone.0212537)
Supplement: S6 File — (CSV) [file pone.0212537.s006.csv]

Vessel length (ft.)	Over 55ft.	Previous experience with observers	Community			0 = No
16	0	1	Hoonah			1 = Yes
24	0	1	Hoonah
28	0	1	Hoonah
31	0	1	Hoonah
34	0	0	Hoonah
35	0	1	Hoonah
44.5	0	1	Hoonah
52	0	1	Hoonah
58	1	1	Hoonah
58	1	1	Hoonah
32	0	1	Juneau
34	0	1	Juneau
34	0	1	Juneau
34.5	0	0	Juneau
35	0	1	Juneau
38	0	1	Juneau
39	0	0	Juneau
42	0	1	Juneau
47	0	0	Juneau
50	0	1	Juneau
54	0	1	Juneau
58	1	1	Juneau
32	0	0	Petersburg
32	0	1	Petersburg
32	0	1	Petersburg
35	0	0	Petersburg
35	0	0	Petersburg
35	0	1	Petersburg
35	0	1	Petersburg
40	0	1	Petersburg
40	0	1	Petersburg
42	0	0	Petersburg
42	0	0	Petersburg
42	0	1	Petersburg
46	0	1	Petersburg
46	0	1	Petersburg
46	0	1	Petersburg
50	0	1	Petersburg
50	0	1	Petersburg
54	0	1	Petersburg
54	0	1	Petersburg
54	0	1	Petersburg
58	1	0	Petersburg
58	1	1	Petersburg
58	1	1	Petersburg
58	1	1	Petersburg
58	1	1	Petersburg
76	1	0	Petersburg
18	0	0	Sitka
19	0	1	Sitka
34	0	0	Sitka
34	0	0	Sitka
34	0	1	Sitka
35	0	0	Sitka
36	0	1	Sitka
38	0	0	Sitka
38	0	1	Sitka
40	0	0	Sitka
42	0	0	Sitka
46	0	0	Sitka
46	0	0	Sitka
47	0	0	Sitka
48	0	0	Sitka
50	0	0	Sitka
50	0	0	Sitka
52	0	1	Sitka
54	0	1	Sitka
54.5	0	1	Sitka
55	0	1	Sitka
56	1	0	Sitka
56	1	1	Sitka
86	1	0	Sitka
